# Supplementary material for: Analysis of αB-crystallin polydispersity in solution through native microfluidic electrophoresis
Source: Royal Society of Chemistry journal article supplement (doi:10.1039/c9an00382g), 2019-01-01
Supplement: c9an00382g1.pdf [file c9an00382g1.pdf]

## Supporting Information

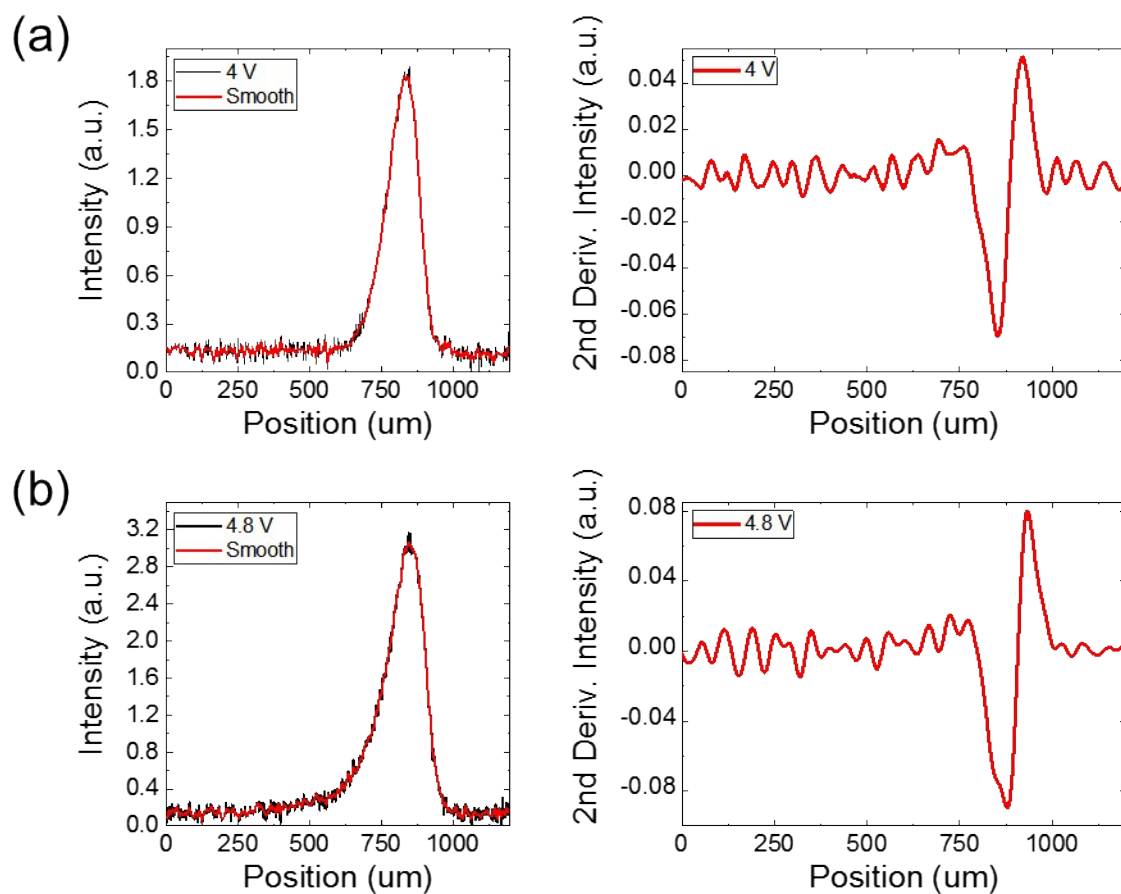

**Figure S1.** Electrophoretic profiles of monomeric-dimeric a) cHsp27 and b) cHsp27 with added DTT show only one peak in the second derivatives indicating a monodisperse solution.
